# Supplementary material for: Eotaxins and Their Receptor as Biomarkers of Colorectal Cancer
Source: MDPI journal article supplement (doi:10.3390/jcm10122675), 2021-06-17
Supplement: s1 [file s1]

**Supplementary Table S1.** Serum levels of tested parameters in colon cancer subtype and control group.

| Parameter         |           | Colon Cancer     | Control Group    | p*     |
|-------------------|-----------|------------------|------------------|--------|
| CCL11<br>[pg/mL]  | Median    | 16.62            | 13.74            | 0.125  |
|                   | Min - Max | 7.94 - 39.30     | 5.68 – 44.42     |        |
| CCL24<br>[pg/mL]  | Median    | 1522.83          | 1341.60          | 0.436  |
|                   | Min – Max | 382.65 - 3357.22 | 222.75 – 4189.99 |        |
| CCL26<br>[pg/mL]  | Median    | 22.00            | 22.00            | 0.654  |
|                   | Min – Max | 6.47 - 31.92     | 10.95 – 78.18    |        |
| CCR3<br>[ng/mL]   | Median    | 0.22             | 0.12             | 0.057  |
|                   | Min – Max | 0.10 - 0.53      | 0.10 – 1.19      |        |
| CA 19-9<br>[U/mL] | Median    | 3.65             | 4.94             | 0.402  |
|                   | Min – Max | 2.00 - 8199.90   | 2.00 - 16.81     |        |
| CEA<br>[ng/mL]    | Median    | 2.70             | 0.83             | <0.001 |
|                   | Min – Max | 0.50 - 1176.50   | 0.50 - 7.82      |        |
| CRP<br>[mg/L]     | Median    | 5.60             | 1.31             | <0.001 |
|                   | Min - Max | 1.20-65.20       | 0.20 - 5.80      |        |

\* U Mann-Whitney test

**Supplementary Table S2.** Serum levels of tested parameters in rectal cancer subtype and control group.

| Parameter         |           | Rectal Cancer    | Control Group    | p*     |
|-------------------|-----------|------------------|------------------|--------|
| CCL11<br>[pg/mL]  | Median    | 12.03            | 13.74            | 0.715  |
|                   | Min - Max | 5.97 - 29.45     | 5.68 – 44.42     |        |
| CCL24<br>[pg/mL]  | Median    | 1461.22          | 1341.60          | 0.589  |
|                   | Min – Max | 193.97 - 4102.92 | 222.75 – 4189.99 |        |
| CCL26<br>[pg/mL]  | Median    | 22.00            | 22.00            | 0.342  |
|                   | Min – Max | 8.55 - 29.96     | 10.95 – 78.18    |        |
| CCR3<br>[ng/mL]   | Median    | 0.22             | 0.12             | 0.012  |
|                   | Min – Max | 0.12 - 0.43      | 0.10 – 1.19      |        |
| CA 19-9<br>[U/mL] | Median    | 4.72             | 4.94             | 0.679  |
|                   | Min – Max | 2.00 - 520.80    | 2.00 - 16.81     |        |
| CEA<br>[ng/mL]    | Median    | 1.83             | 0.83             | 0.003  |
|                   | Min – Max | 0.50 - 72.30     | 0.50 - 7.82      |        |
| CRP<br>[mg/L]     | Median    | 5.40             | 1.31             | <0.001 |
|                   | Min - Max | 1.00 - 103.50    | 0.20 - 5.80      |        |

\* U Mann-Whitney test

**Supplementary Table S3.** Serum levels of tested parameters in cancer subtype groups.

| <b>Parameter</b> |           | <b>Colon Cancer</b> | <b>Rectal Cancer</b> | <b>p*</b> |
|------------------|-----------|---------------------|----------------------|-----------|
| CCL11            | Median    | 16.62               | 12.03                | 0.110     |
| [pg/mL]          | Min - Max | 7.94 - 39.30        | 5.97 - 29.45         |           |
| CCL24            | Median    | 1522.83             | 1461.22              | 0.620     |
| [pg/mL]          | Min – Max | 382.65 - 3357.22    | 193.97 - 4102.92     |           |
| CCL26            | Median    | 22.00               | 22.00                | 0.780     |
| [pg/mL]          | Min – Max | 6.47 - 31.92        | 8.55 - 29.96         |           |
| CCR3             | Median    | 0.22                | 0.22                 | 0.490     |
| [ng/mL]          | Min – Max | 0.10 - 0.53         | 0.12 - 0.43          |           |
| CA 19-9          | Median    | 3.65                | 4.72                 | 0.630     |
| [U/mL]           | Min – Max | 2.00 - 8199.90      | 2.00 - 520.80        |           |
| CEA              | Median    | 2.70                | 1.83                 | 0.310     |
| [ng/mL]          | Min – Max | 0.50 - 1176.50      | 0.50 - 72.30         |           |
| CRP              | Median    | 5.60                | 5.40                 | 0.790     |
| [mg/L]           | Min - Max | 1.20-65.20          | 1.00 - 103.50        |           |

\* U Mann-Whitney test

**Supplementary Table S4.** Serum levels of tested parameters in Early TNM and control groups.

| <b>Parameter</b> |           | <b>Early TNM</b> | <b>Control Group</b> | <b>p*</b>        |
|------------------|-----------|------------------|----------------------|------------------|
| CCL11            | Median    | 12.03            | 13.74                | 0.445            |
| [pg/mL]          | Min - Max | 7.94 - 29.80     | 5.68 – 44.42         |                  |
| CCL24            | Median    | 1417.57          | 1341.60              | 0.907            |
| [pg/mL]          | Min – Max | 383.00 - 3204.00 | 222.75 – 4189.99     |                  |
| CCL26            | Median    | 22.00            | 22.00                | 0.431            |
| [pg/mL]          | Min – Max | 8.55 - 31.90     | 10.95 – 78.18        |                  |
| CCR3             | Median    | 0.22             | 0.12                 | 0.054            |
| [ng/mL]          | Min – Max | 0.10 - 0.53      | 0.10 – 1.19          |                  |
| CA 19-9          | Median    | 3.39             | 4.94                 | 0.142            |
| [U/mL]           | Min – Max | 2.00 - 34.80     | 2.00 - 16.81         |                  |
| CEA              | Median    | 1.84             | 0.83                 | <b>0.006</b>     |
| [ng/mL]          | Min – Max | 0.50 - 31.10     | 0.50 - 7.82          |                  |
| CRP              | Median    | 5.90             | 1.31                 | <b>&lt;0.001</b> |
| [mg/L]           | Min - Max | 1.00 - 104.00    | 0.20 - 5.80          |                  |

\* U Mann-Whitney test

**Supplementary Table S5.** Serum levels of tested parameters in Advanced TNM and control groups.

| Parameter         |           | Advanced TNM     | Control Group    | p*           |
|-------------------|-----------|------------------|------------------|--------------|
| CCL11<br>[pg/mL]  | Median    | 13.80            | 13.74            | 0.570        |
|                   | Min - Max | 5.97 - 39.30     | 5.68 – 44.42     |              |
| CCL24<br>[pg/mL]  | Median    | 1618.36          | 1341.60          | 0.278        |
|                   | Min – Max | 194.00 - 4103.00 | 222.75 – 4189.99 |              |
| CCL26<br>[pg/mL]  | Median    | 22.00            | 22.00            | 0.676        |
|                   | Min – Max | 6.47 - 28.90     | 10.95 – 78.18    |              |
| CCR3<br>[ng/mL]   | Median    | 0.22             | 0.12             | <b>0.024</b> |
|                   | Min – Max | 0.12 - 0.25      | 0.10 – 1.19      |              |
| CA 19-9<br>[U/mL] | Median    | 5.79             | 4.94             | 0.135        |
|                   | Min – Max | 2.00 - 8200.00   | 2.00 - 16.81     |              |
| CEA<br>[ng/mL]    | Median    | 2.70             | 0.83             | <b>0.002</b> |
|                   | Min – Max | 0.50 - 1177.00   | 0.50 - 7.82      |              |
| CRP<br>[mg/L]     | Median    | 3.20             | 1.31             | <b>0.001</b> |
|                   | Min - Max | 1.00 - 83.60     | 0.20 - 5.80      |              |

\* U Mann-Whitney test

**Supplementary Table S6.** Serum levels of tested parameters in different TNM stages of CRC.

| Parameter         |           | Early TNM        | Advanced TNM     | p*    |
|-------------------|-----------|------------------|------------------|-------|
| CCL11<br>[pg/mL]  | Median    | 12.03            | 13.80            | 0.530 |
|                   | Min - Max | 7.94 - 29.80     | 5.97 - 39.30     |       |
| CCL24<br>[pg/mL]  | Median    | 1417.57          | 1618.36          | 0.130 |
|                   | Min – Max | 383.00 - 3204.00 | 194.00 - 4103.00 |       |
| CCL26<br>[pg/mL]  | Median    | 22.00            | 22.00            | 0.950 |
|                   | Min – Max | 8.55 - 31.90     | 6.47 - 28.90     |       |
| CCR3<br>[ng/mL]   | Median    | 0.22             | 0.22             | 0.650 |
|                   | Min – Max | 0.10 - 0.53      | 0.12 - 0.25      |       |
| CA 19-9<br>[U/mL] | Median    | 3.39             | 5.79             | 0.060 |
|                   | Min – Max | 2.00 - 34.80     | 2.00 - 8200.00   |       |
| CEA<br>[ng/mL]    | Median    | 1.84             | 2.70             | 0.370 |
|                   | Min – Max | 0.50 - 31.10     | 0.50 - 1177.00   |       |
| CRP<br>[mg/L]     | Median    | 5.90             | 3.20             | 0.500 |
|                   | Min - Max | 1.00 - 104.00    | 1.00 - 83.60     |       |

\* U Mann-Whitney test
